1

1 **Different energetic diets affect the maintenance of *Apis mellifera* L. colonies during**  
2 **off-season**

3 Gabriela Pinto de Oliveira<sup>1</sup>, Samir Moura Kadri<sup>1</sup>, Bruno Giovane Emilio Benaglia<sup>1</sup>,  
4 Paulo Eduardo Martins Ribolla<sup>2</sup>, Ricardo de Oliveira Orsi<sup>1\*</sup>

5 <sup>1</sup>Center of Education, Science and Technology in Rational Beekeeping (NECTAR),  
6 College of Veterinary Medicine and Animal Sciences, UNESP - University - +55 (14)  
7 3880-2946.

8 <sup>2</sup>Bioscience Institute – UNESP – Parasitology Department- Distrito de Rubião Jr., s/n,  
9 18618-000, Botucatu, São Paulo, Brazil - +55 (14) 3811-6255.

10 \*Corresponding author: Center of Education, Science and Technology in Rational  
11 Beekeeping (NECTAR), College of Veterinary Medicine and Animal Sciences, UNESP  
12 - University - +55 (14) 3880-2946, ricardo.orsi@unesp.br

13 Short title: Energetic diets for *Apis mellifera* L.

14

15

16

17

18

19

20

21 **Abstract.** The aim of this study was to evaluate the best energetic food for use in the  
22 maintenance of honey bee colonies during the off-season. To do this, 20 *Apis mellifera*  
23 beehives were used (with five beehives per treatment): CTL, control (without feeding);  
24 SJ, sugarcane juice; SS, sugar syrup; and IS, inverted sugar. We evaluated the food  
25 consumption, population development, and physiological state (expression of  
26 vitellogenin and hexamerin 70 genes) of each colony. The results showed that the  
27 supplementation of colonies with sugar syrup resulted in an intermediate consumption  
28 and the better development of the colony. In addition, this diet ensured that the colonies  
29 were in a good physiological state, as bees fed this diet presented the highest relative  
30 expression levels of vitellogenin and hexamerin 70 measured among all the diets  
31 tested. Therefore, sugar syrup was concluded to be the best artificial energetic food for  
32 use in the supplementation of honey bee colonies during the off-season.

33 **Key words: beekeeping / energetic foods / gene expression / stress**

## 34 **1. Introduction**

35 All of the nutritional needs of honey bees (*Apis mellifera*) for their complete  
36 development, maintenance, reproduction, and longevity need to be supplied through  
37 food sources available in the environment (Vaudo et al. 2015). In nature, *A.*  
38 *mellifera* bees meet all their nutritional needs through the ingestion of nectar and pollen  
39 (Degrandi-Hoffman and Chain 2015). Nectar has an undeniable importance to  
40 colony development, since it is the main source of energetic food for bees and  
41 permits their survival through the off-season (Traynor et al. 2015). During the off-season,  
42 however, there is a shortage of blossoms and, consequently, of food for the bees. Thus,  
43 nutritional stress caused by food shortages or the availability of foods of only low

44 nutritional value may lead to a reduction in the metabolic activity of the bees  
45 (Crailsheim 1990; Wang et al. 2016). It has also been observed that when there is little  
46 available natural food, there are reductions in the number of worker bees in the hive,  
47 queen's laying and survival rates of individuals, and increases in escape or abandonment  
48 rates (Paiva et al. 2016).

49 This nutritional stress can cause alterations in the bees' metabolic pathways that  
50 influence several biological processes, including the expression of such genes as  
51 vitellogenin and hexamerin 70a. These genes are considered storage genes because they  
52 give rise to proteins that are produced during the larval stage and remain stored in the  
53 hemolymph and/or in the fat body (Martins et al. 2008).

54 Vitellogenin is important in the immune system and longevity of bees because  
55 this protein is a zinc carrier, and thus protects many cell lines against oxidative stress  
56 and apoptosis. Decreased expression of this gene product due to high expression levels  
57 of juvenile hormone was also previously shown to be related to reductions in the  
58 numbers of functional hemocytes in forager bees due to decreases in the quantity of zinc  
59 carried by vitellogenin (Falchuk 1998; Pinto et al. 2000; Amdam et al. 2004; Harwood et  
60 al. 2016).

61 Hexamerin 70a is a gene related to storage, which is expressed in the larval,  
62 pupal, and adult stages of workers, queens, and drones, and is the only protein with a  
63 hexamerin subunit present in significant quantities in the fat body and adult hemolymph  
64 of *A. mellifera*. The synthesis of hexamerins, specifically the subunit 70a, like that of  
65 vitellogenin, is directly related to the quantity and quality of food intake. In older  
66 worker bees, such as forager bees, the levels of this protein are reduced due to the fact

67 that such bees have a low-protein diet, since they do not collect and consume much  
68 pollen and instead preferably consume nectar (Martins et al. 2008).

69 Beekeepers often provide artificial food to their colonies in the off-season to  
70 lessen the negative effects that occur to bee colonies during this period in which food  
71 resources are drastically reduced, and thus ensure the survival and good performance of  
72 the colony. Therefore, the objective of this study was to select the best energetic food to  
73 be offered to bee colonies so that their maintenance is guaranteed during the off-season.  
74 This was done while taking into account the food consumption, population development,  
75 and physiological state of the colony in terms of the expression of the genes for  
76 vitellogenin and hexamerin 70a when bee colonies were provided different foods.

## 77 **2. Materials and methods**

### 78 **2.1 Field experiment**

79 For the field experiment, 20 *Apis mellifera* beehives were selected, and the  
80 number of brooding and feeding frames in them were standardized. The food treatments  
81 used were the following: control (CTL), in which no artificial food was provided;  
82 feeding with sugarcane juice (SJ) produced by the research laboratory itself; feeding  
83 with sugar syrup (SS) prepared using pre-boiled filtered water and commercial crystal  
84 sugar; and feeding with inverted sugar (IS) purchased from Atrium Food Group,  
85 Campinas, Sao Paulo, Brazil.

86 Food was supplied twice a week in the amount of 1 L per hive for a period of 60  
87 days by means of a Boardman artificial feeder. The experiment was carried out in June  
88 and July of 2015. During the experimental period, food consumption was measured  
89 weekly.

90 Population development, including the number and area of open and closed  
91 brooding areas in the central nest structure, was measured monthly in the hives  
92 throughout the experimental period using the methods used and described by Lomele et  
93 al. (2010).

94 The number of brooding and feeding frames was quantified weekly by visual  
95 examination. Physicochemical analyses of the food provided were carried out at the  
96 Laboratory of Bromatology of the Experimental Farm Lageado, College of Veterinary  
97 Medicine and Animal Science, Universidade Estadual Paulista, UNESP, Botucatu, Sao  
98 Paulo, Brazil. Total sugar reduction was performed according to Welke et al. (2008),  
99 calorimetric and dry matter analysis according to Sodré et al. (2011), and ashing  
100 according to Sodré et al. (2007).

## 101 **2.2 Genetic analysis**

### 102 **2.2.1 Honeybee collection**

103 The collection of bees for use in the analysis of the relative expression levels of  
104 the selected genes was done on day 0, which was used as experimental control, as well  
105 as on day 30, which was identified as "Moment 1" (M1) of the collection, and on day  
106 60, which was designated as "Moment 2" (M2) of the collection. Five worker bees  
107 developing nursing behavior were collected from the central group, which were  
108 identified as nursing bees (N), and 5 worker bees were also collected that were carrying  
109 pollen in their corbicle, which in turn were identified as forager bees (F). During the  
110 experimental period, all of the colonies receiving the SJ treatment died, which made it  
111 impossible to collect these bees for analysis. After collection, the bees were  
112 immediately stored in a freezer at -80 °C for future RNA extraction.

## 113 **2.2.2 Relative expression of storage genes**

114 To analyze the expression of vitellogenin and hexamerin 70a, 5 forager and 5  
115 nursing bees were randomly collected and immediately frozen at -80 °C from each  
116 experimental colony at days 0, 30, and 60. Total RNA was extracted from the heads of 5  
117 bees of each type (Scharlaken et al., 2008) using 500 µL of TRIzol® Reagent (Life  
118 Technologies) for each sample according to the manufacturer's instructions. The  
119 extraction product was visualized on 1% agarose gel and quantified using aNanoDrop  
120 Instrument (ND-1000 Spectrophotometer). The RNA was treated with DNase I,  
121 incubated for 60 min at 37 °C and then for 10 min at 75 °C. A solution was then  
122 prepared of 0.75 mM oligo dT, 0.15 mM random oligos, 0.75 mM deoxynucleotide  
123 triphosphates, and 1 µL of RNA, and then it was incubated at 65 °C for 5 min, after  
124 which it was placed on ice for 1 min. We added 1× buffer dithiothreitol  
125 0.005, RNaseOUT (40 U/µL), and 100 U SuperScript® III Reverse Transcriptase  
126 (Invitrogen) to this preparation. Complementary DNA synthesis was performed at 50 °C  
127 for 60 min, followed by 15 min at 70 °C.

128 Amplification was performed with real-time quantitative polymerase chain  
129 reaction (RT-qPCR) in a 25 µL reaction mixture using the SYBR® Green PCR Master  
130 Mix (Applied Biosystems) and 0.2 µM of each primer. The sequences and details of the  
131 primers used are provided in Table I. The RT-qPCR reactions were performed using  
132 ABI 7300 (Applied Biosystems) equipment under the following conditions: 1 cycle at  
133 50 °C for 2 min; 1 cycle at 94 °C for 10 min; and 40 cycles of 94 °C for 15 s and 60 °C  
134 for 1 min. The dissociation curve was obtained under the following conditions: at 95 °C  
135 for 15 s, 60 °C for 30 s, and 95 °C for 15 s. The determination of the expression levels of  
136 vitellogenin and hexamerin 70a was performed in triplicate, and the expression of the

137 actin gene was used as the control (Scharlaken et al. 2008). For each reaction, a negative  
138 control consisting of a mixture of reagents and water was also used.

139 The efficiency of the oligonucleotides (E) was calculated from 4 dilutions of  
140 complementary DNA samples (1:5, 1:25, 1:125, and 1:625) using the formula  $E = 10^{-1/\text{inclination}}$ . The quantification of a gene's relative expression (R) was determined  
141 according to Pfaffl (2001), defining the crossing point as the point at which the detected  
142 fluorescence was appreciably above the background fluorescence and using the formula:  
143

$$144 \quad R = \frac{E_{\text{target}} \times \Delta CP_{\text{target}}(\text{control} - \text{sample})}{\Delta CP_{\text{endogenous}}(\text{control} - \text{sample}) \times E_{\text{endogenous}}}$$

### 145 2.3 Statistical analyses

146 The data obtained for food consumption, population development, and gene  
147 expression were first tested for normality (Anderson-Darling test) and homogeneous  
148 variances (Levene's test). When significant deviations ( $P < 0.05$ ) from these assumptions  
149 were detected, the data were compared using the non-parametric Mann-Whitney test,  
150 and the median and interquartile intervals (Q1\_Q3) were presented. When no significant  
151 deviations from normality and homoscedasticity were detected, the data were analyzed  
152 with one-way ANOVA, and the mean  $\pm$  standard deviation values were presented. P-  
153 values below 0.05 were considered significant. All statistical analyses were performed  
154 using Minitab statistical software.

### 155 3. Results

156 On mean  $\pm$  standard deviation,  $0.994.8 \pm 310$ ,  $894.6 \pm 291$ , and  $433.9 \pm 227.6$   
157 mL of SJ, SS, and IS, respectively, were consumed weekly. The CTL, SJ, SS, and IS  
158 treatments underwent 100, 75, 0, and 0% colony losses, respectively.

159 The results of the physicochemical analyses of the different foods are presented  
160 in Table II. Significant differences were observed in the analysis of SJ ash ( $0.27 \pm$   
161  $0.02\%$ ), in that this value differed significantly from that for SS ( $0.01 \pm 0.001\%$ ), but not  
162 from that for IS ( $0.11 \pm 0.04\%$ ).

163 The calorimetric analysis of the foods showed that SS presented the highest  
164 energetic value ( $4155.0 \text{ kcal kg}^{-1}$ ) of all the foods tested ( $3903.0 \text{ kcal kg}^{-1}$  for SS and  
165  $3895.0 \text{ kcal kg}^{-1}$  for IS). The dry matter values of SJ and SS were lower than that of IS,  
166 indicating they had higher moisture content. The analysis of the total reducing sugars in  
167 each food type showed a higher value for SS ( $41.52 \pm 2.8\%$ ), which differed  
168 significantly from those found for SJ ( $21.15 \pm 1.6\%$ ) and IS ( $0.82 \pm 0.01\%$ ).

169 The data contained in Table III represent the number of brooding and feeding  
170 frames in colonies under different treatments. The number of brooding frames was  
171 higher for colonies in the SS and IS treatments compared to that in the CTL and SJ  
172 treatments. However, the number of feeding frames showed no differences among  
173 treatments. The data shown in Table IV represent the areas of open and closed brooding  
174 areas ( $\text{cm}^2$ ) observed in colonies subjected to different treatments. The treatments SS  
175 and IS presented larger closed brooding areas than the other treatments did. For the  
176 open brooding areas, the largest observed area was recorded in the IS treatment.

177 The mean and standard deviation of the relative expression levels of the  
178 vitellogenin and hexamerin 70a genes in each treatment were calculated, and these are  
179 presented in Tables I and II and Figures 1 and 2.

180 In terms of the relative expression of the vitellogenin gene, from the comparison  
181 between nursing and forager bees at M1 and M2 (Table V and Figure 1) it can be



182 observed that the nursing bees in the CTL, SJ, and IS treatments at M1 and in the CTL  
183 and IS treatments at M2 presented significantly lower relative expression levels of this  
184 gene ( $P < 0.05$ ). However, the inverse was observed in the bees analyzed from the SS  
185 treatment at both M1 and M2 ( $P < 0.05$ ), with the nursing bees expressing this gene at  
186 levels 2862 times greater than those in the forager bees at M2.

187 At M1, when analyzing only the nursing bees in relation to the diets provided,  
188 the treatments CTL, SJ, and IS resulted in the downregulation of this gene (i.e. a  
189 decrease in the relative expression level of the gene in comparison to that in the control  
190 group), whereas in the SS treatment the upregulation of this gene (i.e. increased relative  
191 expression) was noted. For the forager bees sampled at the same time, only those treated  
192 with IS presented downregulation of this gene, which showed that there were differences  
193 in the patterns of gene expression between the nursing and forager bees.

194 When analyzing nursing bees at M2, the expression of this gene was upregulated  
195 in bees in all treatments, although the CTL and SS treatments presented relatively  
196 higher levels of expression compared to those in the IS treatment (67,92 and 205,63  
197 times more than in the IS treatment, respectively). It was observed that bees fed with SS  
198 showed greater expression of this gene in comparison to those in the other treatments,  
199 similarly to what was noted above for the nursing bees collected at M1. However, for  
200 the forager bees collected at the same time, only those treated with SS presented  
201 downregulation of this gene in relation to the control.

202 When changing the focus of the data analysis and comparing the results obtained  
203 for nursing and forager bees between M1 and M2 in the different treatments to check for  
204 changes in the expression pattern of this gene after 60 days of feeding, it was observed

205 that all the analyzed treatments showed differences in their relative expression levels  
206 ( $P < 0.05$ ). In the CTL and IS treatments, both nursing and forager bees showed  
207 increased expression of the vitellogenin gene during the experiment ( $P < 0.05$ ). However,  
208 with the SS treatment, the inverse occurred and there was greater relative expression at  
209 M1 than at M2 in both nursing and forager bees.

210 For the comparison between nursing and forager bees at M1 and M2 in relation  
211 to their relative expression levels of the hexamerin 70a gene (Table VI and Figure 2), in  
212 all treatments except SS there were lower relative expression levels of this gene in the  
213 nursing bees than in the forager bees at M1. This meant that in the nursing bees this  
214 gene was downregulated, whereas in the forager bees it was upregulated. However, the  
215 inverse pattern occurred in the SS treatment, in which the nursing bees presented greater  
216 relative expression levels of hexamerin 70a than the forager bees did, and in the nursing  
217 bees a very extensive upregulation was observed; specifically, the expression of this  
218 gene reached a value 33483 times higher than that in nursing bees at M1, whereas in the  
219 forager bees this gene's expression was downregulated.

220 At M2, this gene was upregulated in both the forager and nursing bees in all  
221 treatments. At this time, it was also possible to observe that the nursing bees had  
222 relatively higher levels of expression of the hexamerin 70a gene than the forager bees  
223 did in all treatments.

#### 224 **4. Discussion**

225 Feeding honey bee colonies with artificial energetic foods during the off-season  
226 ensures the correct annual operation of the colony. For this to be effective, it is  
227 necessary to choose the best energetic food to offer the bees to guarantee the proper

228 development of a colony for the producer. The lower consumption of inverted sugar in  
229 the present study may suggest that this energy supply was less attractive to the bees  
230 when compared to that offered in the other treatments. This fact can be attributed to the  
231 higher viscosity of the inverted sugar, which was supplied to the hives at its full  
232 concentration (Gratão et al. 2004).

233         The dry matter data followed opposing trends among treatments to the different  
234 food types' viscosities, since the moisture content of the food is inversely proportional  
235 to its viscosity (Yanniotis et al. 2006; Cui et al. 2008). Therefore, sugar syrup and  
236 sugarcane juice had lower viscosities, which may have favored their consumption since  
237 nectar, a natural energetic food of bees, has a low viscosity and high humidity (Garcia et  
238 al. 2005; Hazlehurst and Karubian 2016). Furthermore, the higher reducing sugar and  
239 caloric content and the lower ash content of sugar syrup detected in the analyses carried  
240 out in this study, along with this food having an adequate dry matter content, indicated  
241 that this was the food that we supplied to the bees that most closely resembled honey,  
242 which is the main natural source of energy reserves for bee colonies. Thus, because it  
243 has a composition closer to that of the bees' natural food, it was, at least in  
244 bromatological terms, the best source of artificial food for bees that was tested in this  
245 study.

246         Castagnino et al. (2006) showed that energetic supplementation during the off-  
247 season increases the queen's posture. In addition to supplying an energetic diet, a  
248 protein diet is also essential for colony maintenance and improving the queen's posture  
249 (Frias et al. 2016). However, under the conditions of this experiment, the colonies had  
250 bee bread reserves, and thus no protein supplementation was required. In this case, the  
251 energetic supplementation provided assisted in the maintenance of the colonies, and was

252 able to explain the greater number of brooding frames observed in the SS and IS  
253 treatments, suggesting that these energetic foods provided the necessary energetic  
254 support for the queen's posture during this period. Castagnino et al. (2006) obtained a  
255 large brooding area in colonies fed with sugar syrup, which was similar to the results of  
256 the present study. The energy provided by the consumption of the sugar syrup and  
257 inverted sugar probably stimulated the queen's laying.

258         The loss of all of the colonies subjected to the SJ treatment over the  
259 experimental period probably occurred because the sugarcane juice (the diet offered to  
260 bees in the SJ treatment) may have undergone fermentation at ambient temperature  
261 (Pedroso et al. 2005). Given this, it was not possible to obtain data on the relative  
262 expression of the tested genes at Moment 2 in the nursing and forager bees in this  
263 treatment.

264         The analysis of nursing bees at M1 demonstrated an upregulation in vitellogenin  
265 expression in the SS treatment only. This shows that sugar syrup had a more direct  
266 influence on nursing bees than the other foods provided throughout the experimental  
267 period. This result may be related to several factors, such as food viscosity, energetic  
268 value, and the maintenance of food integrity and quality at room temperature.

269         The vitellogenin expression levels observed after 60 days of feeding suggested  
270 that the SS treatment had a greater influence on the expression of this gene than the  
271 other diets, and it also facilitated better population development of the colony since the  
272 values of almost all of the performance parameters observed were higher in this  
273 treatment compared to those in the other treatments. The forager bees, which live  
274 for approximately 21 days, presented less relative expression of this gene than the

275 nursing bees, which were less than 15 days old, at both M1 and M2. This possibly  
276 occurred due to the fact that there was a higher concentration of juvenile hormone in the  
277 hemolymph of the older bees, which may have influenced their biosynthesis of  
278 vitellogenin. As noted earlier, vitellogenin is a protein that is related to the prevention of  
279 oxidative stress since it is a zinc carrier, and the occurrence of low levels of this protein  
280 can compromise the immune system (Dallacqua et al. 2007).

281 Therefore, the results of this study demonstrated that the supplementation of  
282 honey bee colonies in the field during the off-season with sugar syrup results in an  
283 intermediate level of consumption of this food by them and greater colony development,  
284 and also ensured that the bees were in a better physiological state. This showed that this  
285 was the most beneficial artificial energetic food tested in this study.

## 286 **5. Acknowledgements**

287 Fundação de Amparo à Pesquisa do Estado de São Paulo (FAPESP) for the scientific  
288 initiation scholarship provided (FAPESP process: 2017/12001-2).

## 289 **6. References**

- 290 Amdam G V, Simões Z L, Hagen A et al (2004). Hormonal control of the yolk  
291 precursor vitellogenin regulates immune function and longevity in  
292 honeybees. *Experimental gerontology*, 39(5), 767-  
293 773. <https://doi.org/10.1016/j.exger.2004.02.010>
- 294 Castagnino G L, Arboitte M Z, Lengler S, Garcia G G, Glasenapp de Menezes L F  
295 (2006). Desenvolvimento de núcleos de *Apis mellifera* alimentados com suplemento  
296 aminoácido vitamínico, Promotor L. *Ciência Rural*, 685-688.

- 297 Crailsheim K (1990). The protein balance of the honey bee worker. *Apidologie*, 21(5),  
298 417-429.<https://doi.org/10.1051/apido:19900504>
- 299 Cui Z W, Sun L J, Chen W, Sun D W (2008). Preparation of dry honey by microwave–  
300 vacuum drying. *Journal of Food Engineering*, 84(4), 582-  
301 590.<https://doi.org/10.1016/j.jfoodeng.2007.06.027>
- 302 Dallacqua R P, Simões Z L P, Bitondi M M G (2007). Vitellogenin gene expression in  
303 stingless bee workers differing in egg-laying behavior. *Insectes sociaux*, 54(1), 70-  
304 76.<https://doi.org/10.1007/s00040-007-0913-1>
- 305 DeGrandi-Hoffman G, Chen Y (2015). Nutrition, immunity and viral infections in  
306 honey bees. *Current Opinion in Insect Science*, 10, 170-  
307 176.<https://doi.org/10.1016/j.cois.2015.05.007>
- 308 Falchuk K H (1998). The molecular basis for the role of zinc in developmental biology.  
309 In *Molecular and cellular effects of nutrition on disease processes* (pp. 41-48). Springer,  
310 Boston, MA.[https://doi.org/10.1007/978-1-4615-5763-0\\_5](https://doi.org/10.1007/978-1-4615-5763-0_5)
- 311 Frias B E D, Barbosa C D, Lourenço A P (2016). Pollen nutrition in honey bees (*Apis*  
312 *mellifera*): impact on adult health. *Apidologie*, 47(1), 15-25.  
313 <https://doi.org/10.1007/s13592-015-0373-y>
- 314 Garcia J M, Chambers E, Matta Z, Clark M (2005). Viscosity measurements of nectar-  
315 and honey-thick liquids: product, liquid, and time comparisons. *Dysphagia*, 20(4), 325-  
316 335.<https://doi.org/10.1007/s00455-005-0034-9>

- 317 Gratão A C A, Berto M I, Silveira Júnior V (2004). Reologia do açúcar líquido  
318 invertido: influência da temperatura na viscosidade. *Ciência e Tecnologia de*  
319 *Alimentos*, 24(4), 652-656.
- 320 Harwood G P, Ihle K E, Salmela H, Amdam G (2016). Regulation of Honeybee Worker  
321 (*Apis mellifera*) Life Histories by Vitellogenin. *In Non-Mammalian Hormone-Behavior*  
322 *Systems* (Vol. 2, pp. 403-420).Elsevier. [https://doi.org/10.1016/B978-0-12-803592-](https://doi.org/10.1016/B978-0-12-803592-4.00036-5)  
323 [4.00036-5](https://doi.org/10.1016/B978-0-12-803592-4.00036-5)
- 324 Hazlehurst J A, Karubian J O (2016). Nectar robbing impacts pollinator behavior but  
325 not plant reproduction. *Oikos*, 125(11), 1668-1676.<https://doi.org/10.1111/oik.03195>
- 326 Lomele R L, Evangelista A, Ito M M, Ito É H, Gomes S M A, Orsi R O (2010).  
327 Produtos naturais no comportamento defensivo de *Apis mellifera* L. & Natural  
328 products in the defensive behaviour of *Apis mellifera* L. *Acta Scientiarum: Animal*  
329 *Sciences*, 32(3), 285-291.
- 330 Martins J R, Nunes F M F, Simões Z L P, Bitondi M M G (2008). A honeybee storage  
331 protein gene, hex 70a, expressed in developing gonads and nutritionally regulated in  
332 adult fat body. *Journal of insect physiology*, 54(5), 867-  
333 877.<https://doi.org/10.1016/j.jinsphys.2008.03.009>
- 334 Paiva J P L M, Paiva H M, Esposito E, Morais M M (2016). On the Effects of Artificial  
335 Feeding on Bee Colony Dynamics: A Mathematical Model. *PloS one*, 11(11),  
336 e0167054.<https://doi.org/10.1371/journal.pone.0167054>
- 337 Pedroso A D F, Nussio L G, Paziani S D F et al (2005). Fermentation and epiphytic  
338 microflora dynamics in sugar cane silage. *Scientia Agricola*, 62(5), 427-432.  
339 <http://dx.doi.org/10.1590/S0103-90162005000500003>

- 340 Pfaffl M W (2001). A new mathematical model for relative quantification in real-time  
341 RT-PCR. *Nucleic acids research*, 29(9), e45. <https://doi.org/10.1093/nar/29.9.e45>
- 342 Pinto L Z, Bitondi M M, Simões Z L (2000). Inhibition of vitellogenin synthesis in *Apis*  
343 *mellifera* workers by a juvenile hormone analogue, pyriproxyfen. *Journal of Insect*  
344 *Physiology*, 46(2), 153-160. [https://doi.org/10.1016/S0022-1910\(99\)00111-0](https://doi.org/10.1016/S0022-1910(99)00111-0)
- 345 Scharlaken B, de Graaf D C, Goossens K, Peelman L J, Jacobs F J (2008). Differential  
346 gene expression in the honeybee head after a bacterial challenge. *Developmental &*  
347 *Comparative Immunology*, 32(8), 883-889. <https://doi.org/10.1016/j.dci.2008.01.010>
- 348 Sodré G D S, Marchini L C, Moreti A C D C C, Otsuk I P, Carvalho C A L D (2007).  
349 Physical-chemical characterization of honey samples of *Apis mellifera* L.(Hymenoptera:  
350 Apidae) from Ceará State. *Ciência Rural*, 37(4), 1139-  
351 1144. <http://dx.doi.org/10.1590/S0103-84782007000400036>
- 352 Sodré G D S, Marchini L C, Moreti A C D C C, Otsuk I P, Carvalho C A L D (2011).  
353 Physico-chemical characteristics of honey produced by *Apis mellifera* in the Picos  
354 region, state of Piauí, Brazil. *Revista Brasileira de Zootecnia*, 40(8), 1837-  
355 1843. <http://dx.doi.org/10.1590/S1516-35982011000800030>
- 356 Traynor K S, Le Conte Y, Page Jr R E (2015). Age matters: pheromone profiles of  
357 larvae differentially influence foraging behaviour in the honeybee, *Apis*  
358 *mellifera*. *Animal behaviour*, 99, 1-8. <https://doi.org/10.1016/j.anbehav.2014.10.009>
- 359 Vaudo A D, Tooker J F, Grozinger C M, Patch H M (2015). Bee nutrition and floral  
360 resource restoration. *Current Opinion in Insect Science*, 10, 133-  
361 141. <https://doi.org/10.1016/j.cois.2015.05.008>



362 Wang Y, Kaftanoglu O, Brent C S, Page R E, Amdam G V (2016). Starvation stress  
363 during larval development facilitates an adaptive response in adult worker honey bees  
364 (*Apis mellifera* L.). Journal of Experimental Biology, 219(7), 949-  
365 959.[doi: 10.1242/jeb.130435](https://doi.org/10.1242/jeb.130435)

366 Welke J E, Reginatto S, Ferreira D, Vicenzi R, Soares J M (2008). Physicochemical  
367 characterization of *Apis mellifera* L. honeys from the northwest region of Rio Grande  
368 do Sul State. Ciência Rural, 38(6), 1737-1741.[http://dx.doi.org/10.1590/S0103-](http://dx.doi.org/10.1590/S0103-84782008000600038)  
369 84782008000600038

370 Yanniotis S, Skaltsi S, Karaburnioti S (2006). Effect of moisture content on the  
371 viscosity of honey at different temperatures. Journal of Food Engineering, 72(4), 372-  
372 377.<https://doi.org/10.1016/j.jfoodeng.2004.12.017>

373

374

375

376

377

378

379

380

381

382

383 **7. Tables**

384 **Table I:** Oligonucleotides used in gene expression study of *Apis mellifera* that were fed  
 385 with different energetic foods during the off-season.

| Gene                 | Accession number in Gene Bank | Sequence of primers 5'-3'                             | Amplified (pb) | Temperature <sup>a</sup> (°C) | Efficiency of the oligonucleotides <sup>b</sup> (%) |
|----------------------|-------------------------------|-------------------------------------------------------|----------------|-------------------------------|-----------------------------------------------------|
| <i>Actin</i>         | AB023025                      | TGCCAACACT<br>GTCCTTTCTG<br>AGAATTGACCCA<br>CC AATCCA | 156            | 61                            | 91,17                                               |
| <i>vitellogenin</i>  | AJ517411                      | GCAGAATACA<br>TGGACGGTGT<br>GAACAGTCTTCG<br>GAAGCTTG  | 146            | 61                            | 110,17                                              |
| <i>hexamerin 70a</i> | Martins et al, (2008)         | AAAGCCAATCAC<br>GCTCTGAT<br>AATCGTGATTCA<br>GATACCAGC | 119            | 61                            | 116                                                 |

386 <sup>a</sup>Specific optimal annealing temperature for each primer.

387 <sup>b</sup>Measurement of the efficiency or real-time quantitative polymerase chain reaction (RT-  
 388 PCR: calculated using the standard curve)

389

390

391

392

393 **Table II.** Physicochemical analyses of different energetic foods (sugarcane juice, sugar  
394 syrup and inverted sugar).

|                       | Ashing (%)  | Calorimetric<br>(Kcal Kg <sup>-1</sup> ) | Drymatter (%) | Reduced sugars<br>(%) |
|-----------------------|-------------|------------------------------------------|---------------|-----------------------|
| <b>SugarcaneJuice</b> | 0.27±0.02a  | 3903.0                                   | 15.94±0,00a   | 21.15±1,6a            |
| <b>Sugar syrup</b>    | 0.01±0.00b  | 4155.0                                   | 53.84±0.41b   | 41.52±2.8b            |
| <b>Inverted sugar</b> | 0.11±0.04ab | 3895.0                                   | 75.66±0.75c   | 0.82±0.0c             |

395 Different lowercase letters on the same line indicate statistical differences between  
396 means ( $p < 0.05$ ).

397  
398

399

400

401

402

403

404

405

406

407

408

409 **Table III.** Mean and standard deviation of the number of tables occupied in the nest  
410 containing brooding and feeding frames for control, sugarcane juice, sugar syrup and  
411 inverted sugar treatments during the experimental period.

| <b>Occupied frames in the nest with brooding and feeding area</b> |                |              |                    |                       |
|-------------------------------------------------------------------|----------------|--------------|--------------------|-----------------------|
| <b>Sugar cane</b>                                                 |                |              |                    |                       |
| <b>Frame</b>                                                      | <b>Control</b> | <b>Juice</b> | <b>Sugar syrup</b> | <b>Inverted sugar</b> |
| <b>Brooding</b>                                                   | 2,00±0,90a     | 1,90±0,31a   | 3,60±0,67b         | 3,00±1,10c            |
| <b>Feeding</b>                                                    | 4,52±2,60a     | 3,84±1,40a   | 4,00±1,40a         | 4,32±2,10a            |

412 Different lowercase letters on the same line indicate statistical differences between  
413 means ( $p < 0.05$ ).

414  
415

416

417

418

419

420

421

422

423

424

425 **Table IV.** Mean and standard deviation of the open and closed (cm<sup>2</sup>) brooding area  
426 referring to the treatments control, sugarcane juice, sugar syrup and inverted sugar,  
427 during the experimental period.

| Population development (cm <sup>2</sup> ) |              |                 |               |                |
|-------------------------------------------|--------------|-----------------|---------------|----------------|
| Brooding                                  | Control      | Sugarcane Juice | Sugar syrup   | Inverted sugar |
| <b>Closed</b>                             | 188,4±132,2a | 216±167,5a      | 384,9±237,3b  | 401,7±194b     |
| <b>Open</b>                               | 82,9±100,5a  | 100,9±102,1ab   | 158,3±171,6ab | 174,2±126,3b   |

428 Different lowercase letters on the same line indicate statistical differences between  
429 means ( $p < 0.05$ ).

430

431

432

433

434

435

436

437

438

439

440

441 **Table V.** Relative expression of the vitellogenin gene in nursing bees (N) and forager  
 442 bees (F) of the different treatments used after 30 days (Moment 1 - M1) and 60 days  
 443 (Moment 2 - M2).

|             | <b>CTL</b>              | <b>SJ</b>       | <b>SS</b>              | <b>IS</b>            |
|-------------|-------------------------|-----------------|------------------------|----------------------|
| <b>M1 N</b> | 0,0967±0,10 Aa<br>α     | 0,26±0,21<br>Ab | 3653,57±461,62<br>Ac α | 0,071±0,0078<br>Ad α |
| <b>M1 F</b> | 121,88±30,20<br>Ba<br>α | 10,67±1,9<br>Bb | 127,25±16,16 Bc α      | 0,52±0,134 Bd<br>α   |
| <b>M2 N</b> | 378,32±50,29 Aa<br>β    | ---             | 1145,38±376,25<br>Ab β | 5,57±3,23 Ac β       |
| <b>M2 F</b> | 619,9±25,95 Ba<br>β     | ---             | 0,40±0,13 Bb β         | 6,15±0,219 Ac β      |

444 CTL: control; SJ: sugarcane juice; SS: sugar syrup; IS: Invert sugar.  
 445 Different capital letters in the same column indicate statistically significant difference  
 446 between averages compared to the comparison between nursing and forager bees within  
 447 the same collection day ( $p < 0.05$ ).  
 448 Different lowercase letters on the same line indicate statistical difference between  
 449 averages in relation to the comparison of nursing and forager bees between treatments  
 450 on the same collection day ( $p < 0.05$ ).  
 451 Different Greek letters ( $\alpha$  and  $\beta$ ) in the same column indicate statistically significant  
 452 difference between means compared to M1 and M2 nursing bees, and M1 and M2  
 453 forager bees ( $p < 0.05$ ).  
 454 --- Data not obtained due to the death of the colonies during the experimental period.  
 455  
 456

457

458

459 **Table VI.** Relative expression of the hexamerin 70a gene in nursingbees (N) and  
 460 forager bees (F) of the different treatments used after 30 days (Moment 1 - M1) and 60  
 461 days (Moment 2 - M2).

|             | <b>CTL</b>                 | <b>SJ</b>         | <b>SS</b>                     | <b>IS</b>                  |
|-------------|----------------------------|-------------------|-------------------------------|----------------------------|
| <b>M1 N</b> | 0,3818±0,02 Aa<br>$\alpha$ | 1,557±0,34 Ab     | 2554,82±243,59<br>Ac $\alpha$ | 0,2689±0,02<br>Ad $\alpha$ |
| <b>M1 F</b> | 125,46±2,64 Ba<br>$\alpha$ | 1217,16±383,91 Bb | 0,0763±0,003 Bc $\alpha$      | 20,818±1,43 Bd<br>$\alpha$ |
| <b>M2 N</b> | 911,30±49,52 Aa<br>$\beta$ | ---               | 233,83±30,94<br>Ab $\beta$    | 19,256±1,78 Ac<br>$\beta$  |
| <b>M2 F</b> | 2,276±0,21 Ba $\beta$      | ---               | 8,437±1,04 Bb $\beta$         | 9,531±0,60 Bb $\beta$      |

462 CTL: control; SJ: sugarcane juice; SS: sugar syrup; IS: Invert sugar.  
 463 Different capital letters in the same column indicate statistically significant difference  
 464 between averages compared to the comparison between nursing and forager bees within  
 465 the same collection day ( $p < 0.05$ ).  
 466 Different lowercase letters on the same line indicate statistical difference between  
 467 averages in relation to the comparison of nursing and forager bees between treatments  
 468 on the same collection day ( $p < 0.05$ ).  
 469 Different Greek letters ( $\alpha$  and  $\beta$ ) in the same column indicate statistically significant  
 470 difference between means compared to M1 and M2 nursing bees, and M1 and M2  
 471 forager bees ( $p < 0.05$ ).  
 472 --- Data not obtained due to the death of the colonies during the experimental period.  
 473  
 474

475

476 **8. Figures**

477

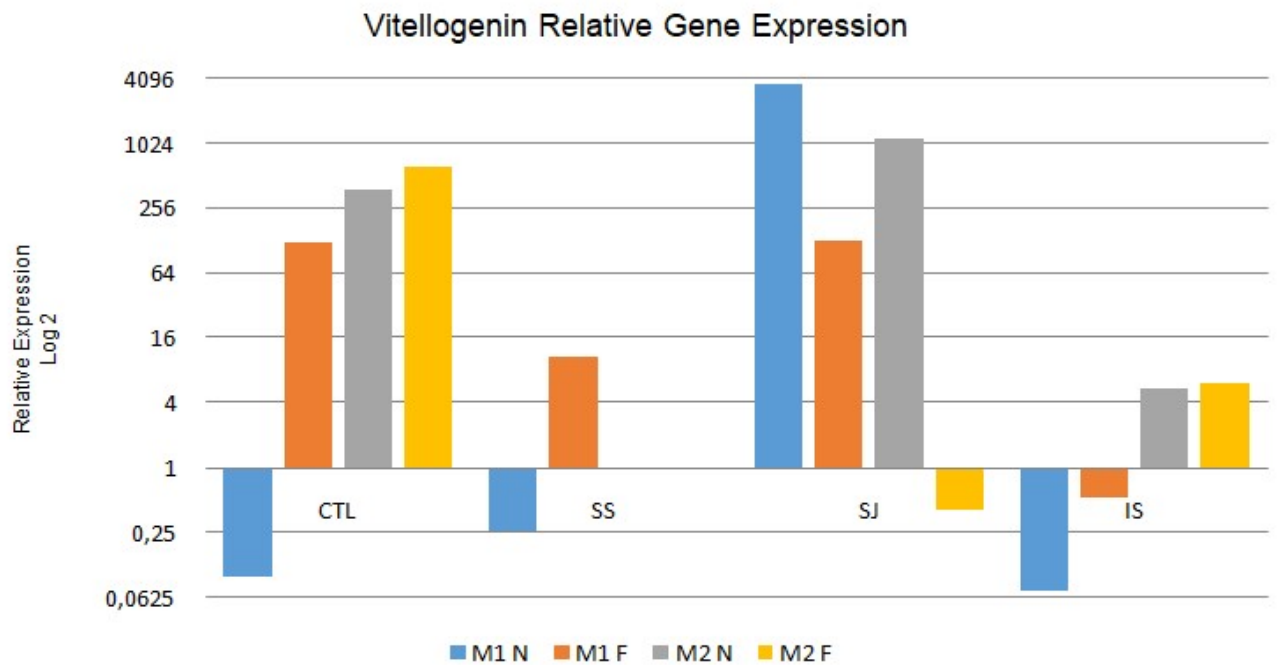

478

479 **Fig. 1** Relative expression of the vitellogenin gene in nursing bees (N) and forager bees  
480 (F) of the different treatments used after 30 days (Moment 1 - M1) and 60 days  
481 (Moment 2 - M2). CTL: control; SJ: sugarcane juice; SS: sugar syrup; IS: Inverted  
482 sugar. M2 N and M2 F: Data not obtained due to death of the colonies during the  
483 experimental period

484

485

486

487

488



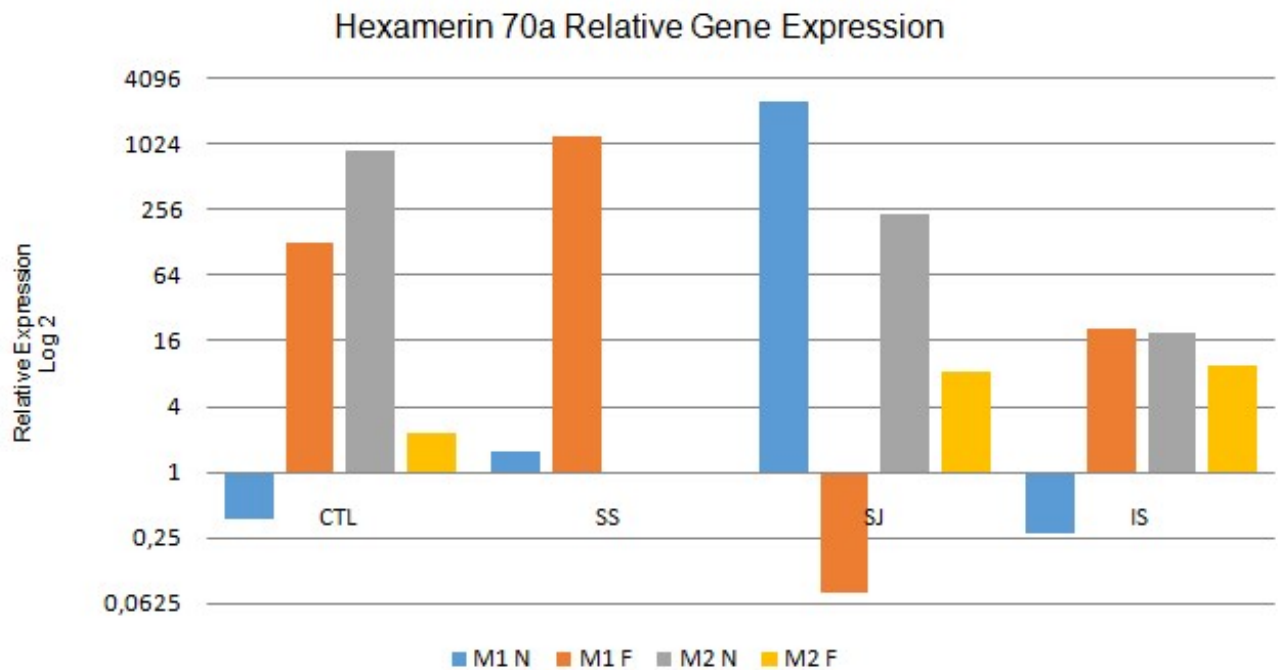

491 **Fig. 2** Relative expression of the hexamerin 70a gene in nursing bees (N) and forager  
492 bees (F) of the different treatments used after 30 days (Moment 1 - M1) and 60 days  
493 (Moment 2 - M2). CTL: control; SJ: sugarcane juice; SS: sugar syrup; IS: Inverted  
494 sugar. M2 N and M2 F: Data not obtained due to death of the colonies during the  
495 experimental period
